# Supplementary material for: The value of urinary gonadotropins in the diagnosis of central precocious puberty: a meta-analysis
Source: Springer Nature journal article supplement (doi:10.1186/s12887-022-03481-1), 2022-07-28
Supplement: MOESM4 [file 23313826]

This is the simple introduction of the sixth included article, which was published in Chinese. This article's title and abstract can be tracked from CNKI database. Some related details are as follows.

### **1. Serum and urinary gonadotropin (Gn) levels and detectability**

In girls with central precocious puberty (CPP), the serum peak luteinizing hormone (PLH) and serum peak follicle-stimulating hormone (PFSH) were  $22.89 \pm 17.31$  and  $15.43 \pm 7.12$  IU/L, respectively, and the nocturnal spontaneous urinary LH and urinary FSH were  $0.303 \pm 0.345$  and  $3.233 \pm 2.250$  IU, respectively. In girls with non-CPP, the PLH and serum PFSH were  $2.78 \pm 1.21$  and  $11.11 \pm 5.12$  IU/L, respectively, and the nocturnal spontaneous urinary LH and urinary FSH were  $0.123 \pm 0.294$  and  $1.941 \pm 2.956$  IU/L, respectively. The levels and detectability of spontaneous serum Gn and urinary Gn are shown in Table 1.

### **2. Correlation of nocturnal spontaneous urinary Gn, spontaneous serum Gn, and serum peak Gn and their receiver operating characteristic (ROC) curve analysis in girls with CPP**

All of the above results are summarized in Table 2. When the PLH was  $\geq 4.86$  IU/L, the sensitivity and specificity for the diagnosis of CPP were 92.9% and 100%, respectively, and the area under the ROC curve was 0.956. When the PLH:PFSH ratio was  $\geq 0.479$ , the sensitivity and specificity for the diagnosis of CPP were 88.1% and 95.2%, respectively, and the area under ROC curve was 0.926.

Table 1. Levels and detectability of spontaneous serum Gn and urinary Gn

|                |                   | Nocturnal spontaneous serum |           | Diurnal spontaneous serum |           | Nocturnal spontaneous urinary |           |
|----------------|-------------------|-----------------------------|-----------|---------------------------|-----------|-------------------------------|-----------|
|                |                   | LH                          | FSH       | LH                        | FSH       | LH                            | FSH       |
| CPP (n=42)     | Level (IU/L)      | 3.29±4.07                   | 4.26±2.63 | 1.73±2.86                 | 4.27±4.00 | 0.80±1.38                     | 7.93±8.53 |
|                | Detectability (%) | 85.7                        | 100.0     | 81.0                      | 100.0     | 69.0                          | 100.0     |
| Non-CPP (n=21) | Level (IU/L)      | 1.06±1.45                   | 3.03±2.24 | 0.60±0.86                 | 2.31±1.45 | 0.33±0.76                     | 6.09±8.21 |
|                | Detectability (%) | 85.7                        | 90.5      | 61.9                      | 90.5      | 33.3                          | 95.2      |

Levels are presented as mean ± standard deviation.

Detectability: the percentage of samples with a level of >0.2 IU/L.

Gn, gonadotropin; CPP, central precocious puberty; LH, luteinizing hormone; FSH, follicle-stimulating hormone

Table 2. Correlation between serum and urinary gonadotropin and receiver operator characteristic curve analysis in analyzing the start of hypothalamic-pituitary-gonadal axis activity for girls with central precocious puberty

|                           | Nocturnal spontaneous serum |                 | Diurnal spontaneous serum |                 | Nocturnal spontaneous urinary |             |
|---------------------------|-----------------------------|-----------------|---------------------------|-----------------|-------------------------------|-------------|
|                           | SLH (IU/L)                  | SLH/SFSH (IU/L) | SLH (IU/L)                | SLH/SFSH (IU/L) | LH (IU)                       | LH/FSH (IU) |
| Correlation coefficient a | 0.423**                     | 0.441*          | 0.514*                    | 0.479*          | 0.597*                        | 0.464*      |
| Correlation coefficient b | 0.585*                      | 0.495*          | 0.546*                    | 0.361**         | -                             | -           |
| Cutoff value              | 1.39                        | 0.38            | 0.97                      | 0.059           | 0.113                         | 0.044       |
| Sensitivity (%)           | 54.8                        | 52.4            | 42.9                      | 92.9            | 71.4                          | 76.2        |
| Specificity (%)           | 85.7                        | 76.2            | 90.5                      | 23.8            | 90.5                          | 52.4        |
| Area under ROC curve      | 0.654                       | 0.592           | 0.680                     | 0.556           | 0.825                         | 0.595       |

Correlation coefficient a: correlation coefficient with serum peak gonadotropin in GnRH stimulation test

Correlation coefficient b: correlation coefficient with nocturnal spontaneous urinary gonadotropin LH, luteinizing hormone; FSH, follicle-stimulating hormone; SLH, serum LH; SFSH, serum FSH; ROC, receiver operator characteristic

\*P < 0.001; \*\*P < 0.01
